# Supplementary material for: Culturing of Cardiac Fibroblasts in Engineered Heart Matrix Reduces Myofibroblast Differentiation but Maintains Their Response to Cyclic Stretch and Transforming Growth Factor β1
Source: MDPI journal article supplement (doi:10.3390/bioengineering9100551), 2022-10-14

## Supplemental figures

### Culturing of cardiac fibroblasts in Engineered Heart Matrix reduces myofibroblast differentiation but maintains their response to cyclic stretch and transforming growth factor $\beta 1$

Meike C. Ploeg<sup>1</sup>, Chantal Munts<sup>1</sup>, Tayeba Seddiqi<sup>1</sup>, Tim J.L. ten Brink<sup>2</sup>, Jonathan Broomhaar<sup>3</sup>, Lorenzo Moroni<sup>2</sup>, Frits. W. Prinzen<sup>1</sup> and Frans. A. van Nieuwenhoven<sup>1\*</sup>

<sup>1</sup>Department of Physiology, Cardiovascular Research Institute Maastricht (CARIM), Maastricht University, the Netherlands, <sup>2</sup>MERLN, Institute for Technology-Inspired Regenerative Medicine, Maastricht University, the Netherlands, <sup>3</sup>MosaMeat, Maastricht, the Netherlands.

\*Correspondence: f.vannieuwenhoven@maastrichtuniversity.nl

**Supplemental Figure S1.** Effect of initial collagen concentration on EHM compaction. EHM-rings using 1 mg/ml (A) or 3 mg/ml (B) initial collagen concentrations (2000 cells/ $\mu$ L) in 250  $\mu$ L gel after 24 h. Images are taken on the black and white grid of 1 x 1 cm. Shown is the silicone mold, the central pole containing the ring in light pink tones, surrounded by CFMM. Bars represent 2 mm. HE staining of the EHM-ring after 24 h using 1 mg/ml (C) and 3 mg/ml (D) initial collagen concentrations (2000 cells/ $\mu$ L in 250  $\mu$ L gel) showing the cell density difference between the two collagen concentrations. Magnification 20x. Bars represent 200  $\mu$ m.

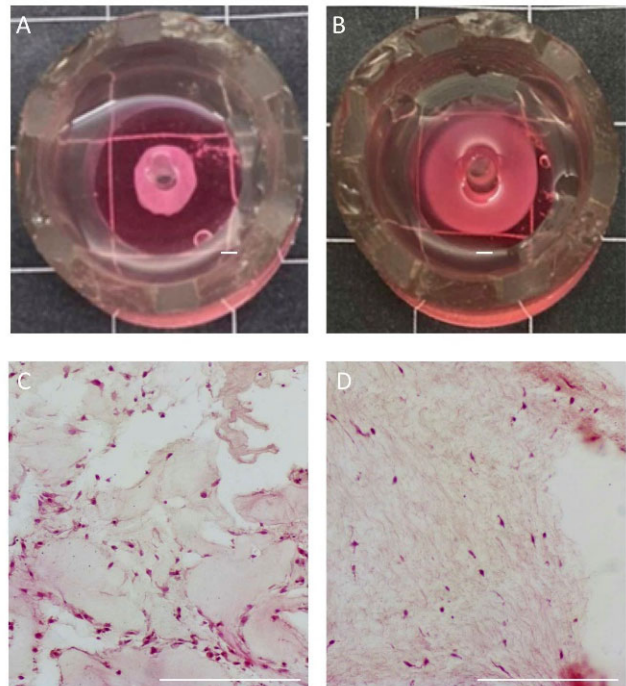

**Supplemental Figure S2.** Effect of initial collagen concentration (1 or 3 mg/ml) on RNA yield per cell (pg/cell) and gene expression of Acta2, Ctgf and Tgf $\beta 1$  of the EHM-rings after 24 h of culture (2000 cells/ $\mu$ L in 250  $\mu$ L gel) (n=2). Bar represents mean.

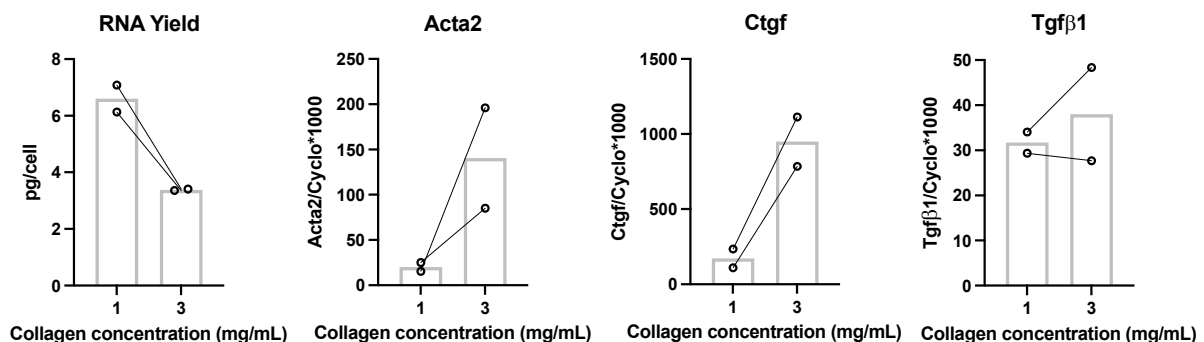

Supplement: s1 [file s1]
